# Supplementary material
Source: publisher figshare collection journal article supplement (https://sage.figshare.com/ndownloader/files/18725186)
Supplement: Supplementary file 1 [file 18725186]

    %% About this Script
    % 'makeQuiverPlot.m'
    % IJRR Submission 15 Dec 2018
    % Audrey Sedal
    
    %this script makes quiver plots showing \tau at all set pressures,
    %organized by kinematic state [mm, \degree]. See Figure 9 of the text
    %for an example using Sample 3; see the appendix for others.

    %% Choose dataset and scales for quiver plot
    
    load('AllDataIJRR.mat', 'AllDataUnBuckled');
    
    i=3;  % use i=1 for Sample 1, i=2 for Sample 2, ... i=8 for Sample 8  
    d = AllDataUnBuckled{i}; %select the validation set from the cell containing all validation sets
    
    %scaling for the vectors
    fg=0.15; %scale on vector magnitude
    f=1200; %scale on moment component
    g=0.0005; %scale on t
    
    %% Make the Quiver Plot
    figure;
    hold on;
    
    % change color of arrows according to interior pressure range
    
    dd = d(find(d(:,7)<1*10^4),:); %select data with P<10 kPa gauge
    q = quiver(floor(dd(:,2)*1000)*0.001, floor(dd(:,3)/10)*10,fg*g*(dd(:,5)),fg*f*(dd(:,6)),'AutoScale','off');
    q.ShowArrowHead='off';
    q.Color=0.9*[1 1 1]; %plot these \tau vectors in pale grey
    q.LineWidth=1;

    dd = d(find(d(:,7)>=1*10^4),:);
    dd= dd(find(dd(:,7)<2.5*10^4),:); %select data with 10 kPag <= P < 25 kPag
    q2 = quiver(floor(dd(:,2)*1000)*0.001, floor(dd(:,3)/10)*10,fg*g*(dd(:,5)),fg*f*(dd(:,6)),'AutoScale','off');
    q2.ShowArrowHead='off';
    q2.Color=(1-0.15)*[1 1 1];
    q2.LineWidth=1;

    dd = d(find(d(:,7)>=2.5*10^4),:);
    dd= dd(find(dd(:,7)<3.5*10^4),:); %select data with 25 kPag <= P < 35 kPag
    q3 = quiver(floor(dd(:,2)*1000)*0.001, floor(dd(:,3)/10)*10,fg*g*(dd(:,5)),fg*f*(dd(:,6)),'AutoScale','off');
    q3.ShowArrowHead='off';
    q3.Color=(1-2*0.15)*[1 1 1];
    q3.LineWidth=1;

    dd = d(find(d(:,7)>=3.5*10^4),:);
    dd= dd(find(dd(:,7)<4.5*10^4),:); %select data with 35 kPag <= P < 45 kPag
    q3 = quiver(floor(dd(:,2)*1000)*0.001, floor(dd(:,3)/10)*10,fg*g*(dd(:,5)),fg*f*(dd(:,6)),'AutoScale','off');
    q3.ShowArrowHead='off';
    q3.Color=(1-3*0.15)*[1 1 1];
    q3.LineWidth=1;

    dd = d(find(d(:,7)>=4.5*10^4),:);
    dd= dd(find(dd(:,7)<5.5*10^4),:); %select data with 45 kPag <= P < 55 kPag
    q4 = quiver(floor(dd(:,2)*1000)*0.001, floor(dd(:,3)/10)*10,fg*g*(dd(:,5)),fg*f*(dd(:,6)),'AutoScale','off');
    q4.ShowArrowHead='off';
    q4.Color=(1-4*0.15)*[1 1 1];
    q4.LineWidth=1;


    dd = d(find(d(:,7)>=5.5*10^4),:);
    dd= dd(find(dd(:,7)<6.5*10^4),:); %select data with 10 kPag <= P < 25 kPag
    q5 = quiver(floor(dd(:,2)*1000)*0.001, floor(dd(:,3)/10)*10,fg*g*(dd(:,5)),fg*f*(dd(:,6)),'AutoScale','off');
    q5.ShowArrowHead='off';
    q5.Color=(1-5*0.15)*[1 1 1];
    q5.LineWidth=1;

    dd = d(find(d(:,7)>=6.5*10^4),:);
    dd= dd(find(dd(:,7)<7.5*10^4),:); %select data with 65 kPag <= P < 75kPag
    q6 = quiver(floor(dd(:,2)*1000)*0.001, floor(dd(:,3)/10)*10,fg*g*(dd(:,5)),fg*f*(dd(:,6)),'AutoScale','off');
    q6.ShowArrowHead='off';
    q6.Color=(1-6*0.15)*[1 1 1];
    q6.LineWidth=1;

    dd = d(find(d(:,7)>=7.5*10^4),:); %select data with 75 kPag <= P
    q7 = quiver(floor(dd(:,2)*1000)*0.001, floor(dd(:,3)/10)*10,fg*g*(dd(:,5)),fg*f*(dd(:,6)),'AutoScale','off');
    q7.ShowArrowHead='off';
    q7.Color=(1-1)*[1 1 1];
    q7.LineWidth=1;
